# Supplementary material
Source: PubMed Central journal article supplement (PMC4893975)
Supplement: NIHMS762095-supplement-01.pdf [file NIHMS762095-supplement-01.pdf]

Supplemental Table 1. Description of the cohort. All characteristics were self-reported at enrollment.  
N=960

| Characteristic                               | N (%) or Mean $\pm$ SD |
|----------------------------------------------|------------------------|
| Age (years)                                  |                        |
| 30-31                                        | 353 (37%)              |
| 32-33                                        | 247 (26%)              |
| 34-35                                        | 153 (16%)              |
| 36-37                                        | 95 (10%)               |
| 38-39                                        | 61 (6%)                |
| 40-41                                        | 37 (4%)                |
| 42-44                                        | 14 (1%)                |
| Race                                         |                        |
| African American                             | 98 (10%)               |
| American Indian/Alaskan                      | 2 (<1%)                |
| Asian/Pacific Islander                       | 61 (6%)                |
| Caucasian                                    | 739 (77%)              |
| Hispanic                                     | 25 (3%)                |
| Other (mixed/unknown)                        | 35 (4%)                |
| Current alcohol use                          | 633 (66%)              |
| Attempt cycle at enrollment                  | 1.8 $\pm$ 1.2          |
| Nulligravid                                  | 460 (48%)              |
| Parous                                       | 349 (36%)              |
| History of one or more therapeutic abortions | 118 (12%)              |
| History of ectopic pregnancy                 | 13 (1%)                |
| History of miscarriage                       | 196 (20%)              |
| Education level                              |                        |
| High school or less                          | 9 (1%)                 |
| Some College                                 | 67 (7%)                |
| College degree                               | 191 (20%)              |
| Some graduate or professional school         | 90 (9%)                |
| Masters degree                               | 366 (38%)              |
| Advanced Post-graduate degree                | 237 (25%)              |
| Current marijuana use                        | 36 (4%)                |
| Partner age (years)                          | 34.7 $\pm$ 5.2         |
| Regular menstrual cycles (yes)               | 823 (86%)              |
| Smoking history                              |                        |
| Never                                        | 731 (76%)              |
| Current                                      | 14 (2%)                |
| Past                                         | 215 (22%)              |
| Body Mass Index                              |                        |
| Underweight                                  | 24 (2%)                |

|               |           |
|---------------|-----------|
| Normal weight | 601 (63%) |
| Overweight    | 193 (20%) |
| Obese         | 142 (15%) |
